# Supplementary material
Source: PubMed Central journal article supplement (PMC8924790)
Supplement: aim-olf-M214784-M21-4784_Supplement.pdf [file aim-olf-M214784-M21-4784_Supplement.pdf]

## Supplementary Material\*

Kaka AS, MacDonald R, Linskens EJ, et al. Major update 2: remdesivir for adults with COVID-19: a living systematic review and meta-analysis for the American College of Physicians Practice Points. *Ann Intern Med.* 2022. [Epub ahead of print]. doi:10.7326/M21-4784

| <b>Item</b>                                                                          | <b>Page</b> |
|--------------------------------------------------------------------------------------|-------------|
| <i>Supplement Table 1.</i> Search Strategies                                         | 2           |
| <i>Supplement Table 2.</i> GRADE Approach to Rating the Certainty of Evidence        | 3           |
| <i>Supplement Table 3.</i> Study characteristics of the included trials              | 4           |
| <i>Supplement Table 4.</i> Study outcomes A                                          | 11          |
| <i>Supplement Table 5.</i> Study outcomes B                                          | 18          |
| <i>Supplement Table 6.</i> Viral load                                                | 21          |
| <i>Supplement Table 7.</i> Harms A (Number of subjects reporting at least one event) | 23          |
| <i>Supplement Table 8.</i> Harms B (Number of subjects reporting at least one event) | 25          |
| <i>Supplement Table 9.</i> Risk of bias of studies                                   | 27          |
| <i>Supplement Table 10.</i> COVID-19 disease severity                                | 30          |
| References                                                                           | 33          |

\* This supplementary material was provided by the authors to give readers further details on their article. The material was reviewed but not copyedited.

### Supplement Table 1. Search Strategies

| Source                                                                                                                                        | Strategy                                                                                                                                                                                                                                                                                                     |
|-----------------------------------------------------------------------------------------------------------------------------------------------|--------------------------------------------------------------------------------------------------------------------------------------------------------------------------------------------------------------------------------------------------------------------------------------------------------------|
| MEDLINE and CENTRAL (Cochrane Central Trials Register)                                                                                        | 1. exp Coronavirus/ or exp Coronavirus Infections/<br>2. (nCoV or 2019-nCoV or ((new or novel or wuhan) adj3 coronavirus) or covid19 or covid-19 or SARS-CoV-2 or "Severe Acute Respiratory Syndrome Coronavirus 2").ti,ab,kw.<br>3. 1 or 2<br>4. (remdesivir or Veklury or GS-5734).ti,ab,kw.<br>5. 3 and 4 |
| WHO Database                                                                                                                                  | 1. remdesivir or Veklury or GS-5734                                                                                                                                                                                                                                                                          |
| NIH COVID-19 iSearch Portfolio                                                                                                                | 1. remdesivir or Veklury or GS-5734<br><br>Title/Abstract fields only, medRxiv                                                                                                                                                                                                                               |
| Journal Tables of Contents (New England Journal of Medicine, JAMA Network, The Lancet)                                                        | Keyword search: (remdesivir or Veklury or GS-5734)                                                                                                                                                                                                                                                           |
| Gilead Sciences, Inc. <a href="https://www.gilead.com/science-and-medicine/research">https://www.gilead.com/science-and-medicine/research</a> |                                                                                                                                                                                                                                                                                                              |

## Supplement Table 2. GRADE Approach to Rating the Certainty of Evidence

The GRADE approach to rating the certainty of evidence for randomized controlled trials is based on five reasons to possibly rate down the quality of evidence.(1)

| <b>Reason</b>                                           | <b>Consequence</b> |
|---------------------------------------------------------|--------------------|
| Limitations in study design or execution (risk of bias) | ↓ 1 or 2 levels    |
| Inconsistency of results                                | ↓ 1 or 2 levels    |
| Indirectness of evidence                                | ↓ 1 or 2 levels    |
| Imprecision                                             | ↓ 1 or 2 levels    |
| Publication bias                                        | ↓ 1 or 2 levels    |

**Supplement Table 3. Study Characteristics of the Included Trials**

| <b>Author, Year Country<br/>Funding<br/>Risk of Bias</b>                                                                                                                                                                    | <b>Intervention<br/>Comparator<br/>Inclusion/exclusion criteria<br/>Study Period/Length of Follow-up</b>                                                                                                                                                                                                                                                                                                                                                                                                                                                                                                                                                                                                                                                                                                                                                                                                                                                                                                                                                                                                                                                                                                                                                                                                                                                                                                                                                                                                           | <b>Demographics</b>                                                                                                                                                                                                                                                                                                                                                                                                                                                                                                                                                                        |
|-----------------------------------------------------------------------------------------------------------------------------------------------------------------------------------------------------------------------------|--------------------------------------------------------------------------------------------------------------------------------------------------------------------------------------------------------------------------------------------------------------------------------------------------------------------------------------------------------------------------------------------------------------------------------------------------------------------------------------------------------------------------------------------------------------------------------------------------------------------------------------------------------------------------------------------------------------------------------------------------------------------------------------------------------------------------------------------------------------------------------------------------------------------------------------------------------------------------------------------------------------------------------------------------------------------------------------------------------------------------------------------------------------------------------------------------------------------------------------------------------------------------------------------------------------------------------------------------------------------------------------------------------------------------------------------------------------------------------------------------------------------|--------------------------------------------------------------------------------------------------------------------------------------------------------------------------------------------------------------------------------------------------------------------------------------------------------------------------------------------------------------------------------------------------------------------------------------------------------------------------------------------------------------------------------------------------------------------------------------------|
| <p>Beigel 2020 (1)<br/>Adaptive Covid-19 Treatment Trial (ACTT-1)</p> <p>Multinational (60 sites and 13 subsites, 45 in the US)</p> <p>Design: RCT</p> <p>Funding: Primarily government, other</p> <p>Risk of Bias: Low</p> | <p>Intervention: Remdesivir (n=541) 200 mg on day 1 followed by 100 mg on days 2–10 (or until hospital discharge or death) in single daily infusions</p> <p>Comparator: Placebo (n=521)</p> <p>Inclusion criteria: 18 years or older and meeting one of the following criteria suggestive of lower respiratory tract infection at enrollment: radiographic infiltrates by imaging study, peripheral oxygen saturation (SpO<sub>2</sub>) ≤94% on room air, or requiring supplemental oxygen, mechanical ventilation, or ECMO; no limit to duration of symptoms prior to enrollment; laboratory-confirmed SARS-CoV-2 infection as determined by a positive RT-PCR assay result from any respiratory specimen collected &lt;72 hours prior to randomization (during the study, this criterion was modified due to limitations in testing capacity to also allow a RT-PCR positive specimen that was collected ≥72 hours prior to randomization if the site was unable to obtain a repeat sample and if the participant had progressive disease consistent with ongoing SARS-CoV-2 infection)</p> <p>Exclusion criteria: ALT or AST &gt;5 times the upper limit of the normal range, impaired renal function as determined by calculating an eGFR or need for hemodialysis or hemofiltration, allergy to study product, pregnancy or breast-feeding, and anticipated discharge from hospital or transfer to another hospital within 72 hours of enrollment</p> <p><b>Study Period/Length of Follow-up:</b> 29 days</p> | <p>N=1062</p> <p><b>Age (years, mean):</b> 59</p> <p><b>Gender (male):</b> 64%</p> <p><b>Race/Ethnicity:</b><br/>White 53%<br/>Black/African American 21%<br/>Asian 13%<br/>Latino (of any race) 23%</p> <p><b>Time from symptom onset to randomization</b><br/>Overall, median [IQR] 9 days [6-12]<br/>Remdesivir median [IQR] 9 days [6-12]<br/>Placebo median [IQR] 9 days [7-13]</p> <p><b>Oxygen status on admission:</b><br/>Percent on no oxygen 13%<br/>Percent on supplemental oxygen 41%<br/>Percent on non-invasive ventilation 18%<br/>Percent on invasive ventilation 27%</p> |

| Author, Year Country<br>Funding<br>Risk of Bias                                                              | Intervention<br>Comparator<br>Inclusion/exclusion criteria<br>Study Period/Length of Follow-up                                                                                                                                                                                                                                                                                                                                                                                                                                                                                                                                                                                                                                                                                                                                                                                                                                                                                               | Demographics                                                                                                                                                                                                                                                                                                                                                                                                                                                                                                                                                                                                                                                  |
|--------------------------------------------------------------------------------------------------------------|----------------------------------------------------------------------------------------------------------------------------------------------------------------------------------------------------------------------------------------------------------------------------------------------------------------------------------------------------------------------------------------------------------------------------------------------------------------------------------------------------------------------------------------------------------------------------------------------------------------------------------------------------------------------------------------------------------------------------------------------------------------------------------------------------------------------------------------------------------------------------------------------------------------------------------------------------------------------------------------------|---------------------------------------------------------------------------------------------------------------------------------------------------------------------------------------------------------------------------------------------------------------------------------------------------------------------------------------------------------------------------------------------------------------------------------------------------------------------------------------------------------------------------------------------------------------------------------------------------------------------------------------------------------------|
| <p>Wang 2020 (2)<br/>China</p> <p>Design: RCT</p> <p>Funding: Government, other</p> <p>Risk of Bias: Low</p> | <p>Intervention: Remdesivir (n=158; 2:1 ratio) 200 mg on day 1 followed by 100 mg on days 2–10 in single daily infusions</p> <p>Comparator: Placebo (n=79)</p> <p>Inclusion criteria: men and non-pregnant women with COVID-19, age at least 18 years, RT-PCR positive for SARS-CoV-2, pneumonia confirmed by chest imaging, oxygen saturation of 94% or lower on room air or a ratio of arterial oxygen partial pressure to fractional inspired oxygen of 300 mm Hg or less, within 12 days of symptom onset</p> <p>Exclusion criteria: pregnancy or breast feeding; hepatic cirrhosis; ALT or AST &gt;5 times the upper limit of the normal range; known severe renal impairment (estimated eGFR&lt;30 mL/min per 1.73 m<sup>2</sup>) or receipt of continuous renal replacement therapy, hemodialysis, or peritoneal dialysis; enrolment into an investigational treatment study for COVID-19 in the 30 days before screening</p> <p><b>Study Period/Length of Follow-up:</b> 28 days</p> | <p>N=237</p> <p><b>Age (years, median):</b><br/>Remdesivir 66<br/>Placebo 64</p> <p><b>Gender (male):</b><br/>Remdesivir 56%<br/>Placebo 65%</p> <p><b>Race:</b> East Asian</p> <p><b>Time from symptom onset to drug</b><br/>Remdesivir median [IQR] 11 days [9-12]<br/>Placebo median [IQR] 10 days [9-12]</p> <p><b>Oxygen status on admission:</b></p> <p>Percent on no oxygen<br/>Remdesivir 0%<br/>Placebo 4%</p> <p>Percent on supplemental O<sub>2</sub><br/>Remdesivir 82%<br/>Placebo 83%</p> <p>Percent on non-invasive ventilation<br/>Remdesivir 18%<br/>Placebo 12%</p> <p>Percent on invasive ventilation<br/>Remdesivir 0%<br/>Placebo 1%</p> |
| <p>Goldman 2020 (3)<br/>GS-US-540-5773<br/>SIMPLE 1</p>                                                      | <p>Intervention 1: Remdesivir, 5-day course (n=200) 200 mg on day 1 followed by 100 mg on days 2–5 in single daily infusions</p>                                                                                                                                                                                                                                                                                                                                                                                                                                                                                                                                                                                                                                                                                                                                                                                                                                                             | <p>N=397</p> <p><b>Age (years, median):</b><br/>5-day group 61</p>                                                                                                                                                                                                                                                                                                                                                                                                                                                                                                                                                                                            |

| Author, Year Country<br>Funding<br>Risk of Bias                                                                                                                                                                                                                          | Intervention<br>Comparator<br>Inclusion/exclusion criteria<br>Study Period/Length of Follow-up                                                                                                                                                                                                                                                                                                                                                                                                                                                                                                                                                                                                                                                                                                                                                                                                                                                                                                                                                                                                                                                                                                                                                                                                                                                                                                                                                                                                                                         | Demographics                                                                                                                                                                                                                                                                                                                                                                                                                                                                                                            |
|--------------------------------------------------------------------------------------------------------------------------------------------------------------------------------------------------------------------------------------------------------------------------|----------------------------------------------------------------------------------------------------------------------------------------------------------------------------------------------------------------------------------------------------------------------------------------------------------------------------------------------------------------------------------------------------------------------------------------------------------------------------------------------------------------------------------------------------------------------------------------------------------------------------------------------------------------------------------------------------------------------------------------------------------------------------------------------------------------------------------------------------------------------------------------------------------------------------------------------------------------------------------------------------------------------------------------------------------------------------------------------------------------------------------------------------------------------------------------------------------------------------------------------------------------------------------------------------------------------------------------------------------------------------------------------------------------------------------------------------------------------------------------------------------------------------------------|-------------------------------------------------------------------------------------------------------------------------------------------------------------------------------------------------------------------------------------------------------------------------------------------------------------------------------------------------------------------------------------------------------------------------------------------------------------------------------------------------------------------------|
| <p>55 hospitals around the world, including sites in the US, Italy, Spain, Germany, Hong Kong, Singapore, South Korea, and Taiwan.</p> <p>Design: Randomized, open-label, multi-center Phase 3 clinical trial</p> <p>Funding: Industry</p> <p>Risk of Bias: Moderate</p> | <p>Intervention 2: Remdesivir, 10-day course (n=197) 200 mg on day 1 followed by 100 mg on days 2–10 in single daily infusions</p> <p>Inclusion criteria: patients <math>\geq 18</math> years (at all sites), or aged <math>\geq 12</math> and <math>&lt; 18</math> years of age weighing <math>\geq 40</math> kg (where permitted according to local law) currently hospitalized with SARS-CoV-2 infection confirmed by PCR test <math>\leq 4</math> days before randomization; radiographic evidence of pulmonary infiltrates and peripheral capillary oxygen saturation (SpO<sub>2</sub>) <math>\leq 94\%</math> or requiring supplemental oxygen at screening</p> <p>Exclusion criteria: Pregnant or women who were breast feeding infants, ALT or AST <math>&gt;5</math> times the upper limit of the normal range, creatinine clearance <math>&lt; 50</math> mL/min using the Cockcroft-Gault formula for participants <math>\geq 18</math> years of age and Schwartz Formula for participants <math>&lt; 18</math> years of age; mechanically ventilated (including V-V ECMO) <math>\geq 5</math> days, or any duration of V-A ECMO; evidence of multiorgan failure; concurrent treatment with other agents with actual or possible direct acting antiviral activity against SARS-CoV-2 <math>&lt; 24</math> hours prior to study drug dosing; participant in any other clinical trial of an experimental treatment for COVID-19</p> <p><b>Study Period/Length of Follow-up:</b> 14 days (up to 30 days for adverse events)</p> | <p>10-day group 62</p> <p><b>Gender (male):</b><br/>5-day group 60%<br/>10-day group 68%</p> <p><b>Race:</b><br/>White 70%<br/>Black 11%<br/>Asian 11%<br/>Other 7%</p> <p><b>Time from symptom onset to drug</b><br/>Remdesivir 5-day median [IQR] 8 days [5-11]<br/>Remdesivir 10-day median [IQR] 9 days [6-12]</p> <p><b>Oxygen status on admission:</b><br/>Percent on no oxygen 14%<br/>Percent on supplemental oxygen 55%<br/>Percent on non-invasive ventilation 27%<br/>Percent on invasive ventilation 4%</p> |
| <p>Spinner 2020 (4)<br/>GS-US-540-5774<br/>SIMPLE 2</p>                                                                                                                                                                                                                  | <p>Intervention 1: Remdesivir, 5-day course (n=199) 200 mg on day 1 followed by 100 mg on days 2–5 in single daily infusions</p>                                                                                                                                                                                                                                                                                                                                                                                                                                                                                                                                                                                                                                                                                                                                                                                                                                                                                                                                                                                                                                                                                                                                                                                                                                                                                                                                                                                                       | <p><b>N=596 randomized (584 analyzed)</b><br/><b>Age (years, median):</b><br/>5-day group 58<br/>10-day group 56<br/>Standard care 57</p>                                                                                                                                                                                                                                                                                                                                                                               |

| Author, Year Country<br>Funding<br>Risk of Bias                                                                                                                                                                                                                                              | Intervention<br>Comparator<br>Inclusion/exclusion criteria<br>Study Period/Length of Follow-up                                                                                                                                                                                                                                                                                                                                                                                                                                                                                                                                                                                                                                                                                                                                                                                                                                                                                                                                                                                                                                                                                                                                                                                                                                                                                  | Demographics                                                                                                                                                                                                                                                                                                                                                                                                                                                                                |
|----------------------------------------------------------------------------------------------------------------------------------------------------------------------------------------------------------------------------------------------------------------------------------------------|---------------------------------------------------------------------------------------------------------------------------------------------------------------------------------------------------------------------------------------------------------------------------------------------------------------------------------------------------------------------------------------------------------------------------------------------------------------------------------------------------------------------------------------------------------------------------------------------------------------------------------------------------------------------------------------------------------------------------------------------------------------------------------------------------------------------------------------------------------------------------------------------------------------------------------------------------------------------------------------------------------------------------------------------------------------------------------------------------------------------------------------------------------------------------------------------------------------------------------------------------------------------------------------------------------------------------------------------------------------------------------|---------------------------------------------------------------------------------------------------------------------------------------------------------------------------------------------------------------------------------------------------------------------------------------------------------------------------------------------------------------------------------------------------------------------------------------------------------------------------------------------|
| <p>105 sites in the US, France, Germany, Hong Kong, Italy, Republic of Korea, The Netherlands, Singapore, Spain, Switzerland, Taiwan and the United Kingdom</p> <p>Design: Randomized, open-label, multi-center Phase 3 clinical trial</p> <p>Funding: Industry</p> <p>Risk of Bias: Low</p> | <p>Intervention 2: Remdesivir, 10-day course (n=197) 200 mg on day 1 followed by 100 mg on days 2–10 in single daily infusions</p> <p>Comparator: Standard care (n=200)</p> <p>Inclusion criteria: ≥ 18 years (at all sites), or aged ≥ 12 and &lt; 18 years of age weighing ≥ 40 kg (where permitted according to local law and approved by relevant review boards) currently hospitalized and requiring medical care for COVID-19; SARS-CoV-2 infection confirmed by PCR test ≤ 4 days before randomization; moderate COVID-19 pneumonia (peripheral capillary oxygen saturation (SpO<sub>2</sub>) &gt;94% on room air radiographic evidence of pulmonary infiltrates)</p> <p>Exclusion criteria: Women who were pregnant or breast feeding infants, ALT or AST &gt;5 times the upper limit of the normal range; creatinine clearance &lt; 50 mL/min using the Cockcroft-Gault formula for participants ≥ 18 years of age and Schwartz Formula for participants &lt; 18 years of age; mechanically ventilated at screening; concurrent treatment or planned concurrent treatment with other agents with actual or possible direct acting antiviral activity against SARS-CoV-2; participation in any other clinical trial of an experimental treatment for COVID-19</p> <p><b>Study Period/Length of Follow-up:</b> 11 days (primary outcome); final assessment on day 28</p> | <p><b>Gender (male):</b> 61%</p> <p><b>Race:</b><br/>White 58%<br/>Black 18%<br/>Asian 18%<br/>Other 7%<br/>Latino (of any race) 18%</p> <p><b>Time from symptom onset to drug</b><br/>Remdesivir 5-day median [IQR] 8 days [5-11]<br/>Remdesivir 10-day median [IQR] 8 days [5-11]</p> <p><b>Oxygen status on admission:</b><br/>Percent on no oxygen: 84%<br/>Percent on supplemental oxygen: 15%<br/>Percent on non-invasive ventilation: NA<br/>Percent on invasive ventilation: NA</p> |
| WHO Solidarity 2020 (5)                                                                                                                                                                                                                                                                      | Intervention: Remdesivir, intravenous, (n=2750), 200 mg on day 0 followed by 100 mg on days 1-9 (treatment stopped at discharge or death)                                                                                                                                                                                                                                                                                                                                                                                                                                                                                                                                                                                                                                                                                                                                                                                                                                                                                                                                                                                                                                                                                                                                                                                                                                       | <p><b>N=5475 randomized (5451 analyzed)</b></p> <p><b>Age (years):</b><br/>&lt;50: 35%</p>                                                                                                                                                                                                                                                                                                                                                                                                  |

| Author, Year Country<br>Funding<br>Risk of Bias                                                                                                                                                                                                                                                                                                                                                                            | Intervention<br>Comparator<br>Inclusion/exclusion criteria<br>Study Period/Length of Follow-up                                                                                                                                                                                                                                                                                                                                                                                                                                                                                                                            | Demographics                                                                                                                                                                                                                                                                                                                                                                                                                                                                 |
|----------------------------------------------------------------------------------------------------------------------------------------------------------------------------------------------------------------------------------------------------------------------------------------------------------------------------------------------------------------------------------------------------------------------------|---------------------------------------------------------------------------------------------------------------------------------------------------------------------------------------------------------------------------------------------------------------------------------------------------------------------------------------------------------------------------------------------------------------------------------------------------------------------------------------------------------------------------------------------------------------------------------------------------------------------------|------------------------------------------------------------------------------------------------------------------------------------------------------------------------------------------------------------------------------------------------------------------------------------------------------------------------------------------------------------------------------------------------------------------------------------------------------------------------------|
| <p>30 countries: Europe (13), Canada, Latin America (5), Asia (9), Africa (2)</p> <p>Design: Open-label randomized trial</p> <p>Funding: No funders for main Solidarity trial</p> <p>Risk of Bias: Moderate</p>                                                                                                                                                                                                            | <p>Comparator: No study drug (local standard of care) (n=2725)</p> <p>Inclusion criteria: ≥ 18 years, hospitalized with a diagnosis of COVID-19, not known to have received any study drug, without anticipated transfer elsewhere within 72 hours, no contraindication to any study drug (physician's view)</p> <p>Exclusion criteria: none reported</p> <p><b>Study Period/Length of Follow-up:</b> 28 days (Note: mortality only during initial hospitalization; follow-up ceased at discharge)</p>                                                                                                                    | <p>50-69: 47%</p> <p>70+: 18%</p> <p><b>Gender (male):</b> 63%</p> <p><b>Race: NR</b></p> <p><b>Geographic Location</b></p> <p>Europe or Canada: 26%</p> <p>Latin America: 18%</p> <p>Asia or Africa: 56%</p> <p><b>Time from symptom onset to drug: NR</b></p> <p><b>Oxygen status on admission:</b></p> <p>Percent on no oxygen: 24%</p> <p>Percent on oxygen: 67%</p> <p>Percent on ventilation: 9%</p>                                                                   |
| <p><b>DisCoVeRy 2021 (8) *</b></p> <p><b>Sub-study of WHO Solidarity with additional newer recruited patients not included in WHO Solidarity study results. 53% (n=440) of the study population was included WHO Solidarity results and 47% (n=392) patients were unique</b></p> <p><b>5 countries with 48 sites: France, Belgium, Austria, Portugal, Luxembourg</b></p> <p><b>Design: Open-label randomized trial</b></p> | <p><b>Intervention: Remdesivir, intravenous, (n=429), 200 mg on day 0 followed by 100 mg on days 1-9 (treatment stopped after 5 days if the patient was discharged)</b></p> <p><b>Comparator: No study drug (local standard of care) (n=428)</b></p> <p><b>Inclusion criteria: (see WHO Solidarity)</b></p> <p><b>Exclusion criteria: Liver enzymes (ALT/AST) levels &gt;5 times the upper limit of normal, stage 4 severe chronic kidney disease or requiring dialysis (ie, eGFR &lt;30 mL/min), anticipated transfer to another hospital, which is not a study site within 72 hours, pregnant or breastfeeding,</b></p> | <p><b>N=857 randomized (832 analyzed)</b></p> <p><b>Age (years, median): 64</b></p> <p><b>Gender (male): 70%</b></p> <p><b>Race:</b></p> <p>White 69%</p> <p>North African 15%</p> <p>Sub-Saharan African 7%</p> <p>Other 9%</p> <p><b>Time from symptom onset to drug: median [IQR] 9 days [7-12]</b></p> <p><b>Oxygen status on admission:</b></p> <p>Percent on no oxygen: 1%</p> <p>Percent on supplemental oxygen 77%</p> <p>Percent on non-invasive ventilation 4%</p> |

| Author, Year Country<br>Funding<br>Risk of Bias                                                                                                                                                                                                         | Intervention<br>Comparator<br>Inclusion/exclusion criteria<br>Study Period/Length of Follow-up                                                                                                                                                                                                                                                                                                                                                                                                                                                                                                                                                                                                                                                                                                                                                                                                              | Demographics                                                                                                                                                                                                                                                                                                                                        |
|---------------------------------------------------------------------------------------------------------------------------------------------------------------------------------------------------------------------------------------------------------|-------------------------------------------------------------------------------------------------------------------------------------------------------------------------------------------------------------------------------------------------------------------------------------------------------------------------------------------------------------------------------------------------------------------------------------------------------------------------------------------------------------------------------------------------------------------------------------------------------------------------------------------------------------------------------------------------------------------------------------------------------------------------------------------------------------------------------------------------------------------------------------------------------------|-----------------------------------------------------------------------------------------------------------------------------------------------------------------------------------------------------------------------------------------------------------------------------------------------------------------------------------------------------|
| <p><i>Funding: Institut National de al Santé et de la Recherche Médicale</i></p> <p>Risk of Bias: Low</p>                                                                                                                                               | <p><i>previously treated with one of the antivirals evaluated in the trial in the past 29 days, contraindication to any study medication including allergy</i></p> <p><b>Study Period/Length of Follow-up: 28 days</b></p>                                                                                                                                                                                                                                                                                                                                                                                                                                                                                                                                                                                                                                                                                  | <p><i>Percent on invasive ventilation 18%</i><br/><i>Percent on ECMO &lt;1%</i></p>                                                                                                                                                                                                                                                                 |
| <p><b>NOR-Solidarity 2021 (7)</b><br/><b>Sub-study of WHO Solidarity</b></p> <p><b>Norway</b></p> <p><i>Design: Open-label randomized trial</i></p> <p><i>Funding: National Clinical Therapy Research in the Specialist Health Services, Norway</i></p> | <p><b>Intervention: Remdesivir, intravenous, (n=43), 200 mg on day 0 followed by 100 mg on days 1-9 (treatment stopped at discharge or death)</b></p> <p><b>Comparator: No study drug (local standard of care) (n=58 allocated versus remdesivir, 87 total in full analysis set)</b></p> <p><b>Inclusion criteria: (see WHO Solidarity)</b></p> <p><b>Exclusion criteria: severe comorbid conditions with life expectancy &lt;3 months, level of aspartate aminotransferase or ALT &gt; 5 times the upper limit of normal, rate-corrected QT interval greater &gt;470 ms, pregnancy, breastfeeding, acute occurrence of a comorbid condition in a 7-day period before inclusion, known intolerance to study drugs, participation in a potentially confounding trial, or concomitant medications interfering with the study drugs</b></p> <p><b>Study Period/Length of Follow-up: 90 days (3 months)</b></p> | <p><b>N=101 randomized (83 completed 3-month follow-up).</b><br/><b>Age (years): 59</b><br/><b>Gender (male): 73%</b><br/><b>Race: NR</b></p> <p><b>Time from symptom onset to drug: mean 7 days</b></p> <p><b>Oxygen status on admission: NR</b><br/><b>Patients with respiratory failure (Po<sub>2</sub>-Flo<sub>2</sub> &lt;40 kPa): 44%</b></p> |
| <p>Mahajan 2021 (6)</p> <p>India</p>                                                                                                                                                                                                                    | <p><b>Intervention: Remdesivir, intravenous, (n=41) 200 mg on day 1 followed by 100 mg once daily on days 2-5. Both treatment groups continued supportive therapy</b></p> <p><b>Comparator: No study drug (local standard of care) (n=41)</b></p>                                                                                                                                                                                                                                                                                                                                                                                                                                                                                                                                                                                                                                                           | <p><b>N=82 randomized (70 analyzed)</b><br/><b>Age (years): 58</b><br/><b>Gender (male): 66%</b><br/><b>Race: NR</b></p>                                                                                                                                                                                                                            |

| <b>Author, Year Country<br/>Funding<br/>Risk of Bias</b>                                                                                  | <b>Intervention<br/>Comparator<br/>Inclusion/exclusion criteria<br/>Study Period/Length of Follow-up</b>                                                                                                                                                                                                                                                                                                                                                                                                                                                                              | <b>Demographics</b>                                                                                                                                                                                                                                                                         |
|-------------------------------------------------------------------------------------------------------------------------------------------|---------------------------------------------------------------------------------------------------------------------------------------------------------------------------------------------------------------------------------------------------------------------------------------------------------------------------------------------------------------------------------------------------------------------------------------------------------------------------------------------------------------------------------------------------------------------------------------|---------------------------------------------------------------------------------------------------------------------------------------------------------------------------------------------------------------------------------------------------------------------------------------------|
| <p>Design: Open-label randomized trial</p> <p>Funding: No funders</p> <p>Risk of Bias: High</p>                                           | <p>Inclusion criteria: 18 to 60 years of age hospitalized with a diagnosis of COVID-19 by PCR, radiographic evidence of pneumonia, respiratory rate &gt;24/min, oxygen saturation ≤94%, creatine clearance &gt;40 mL/min</p> <p>Exclusion criteria: receiving mechanical ventilation, multi organ failure, AST/ALT &gt;3 times the upper limit of normal</p> <p><b>Study Period/Length of Follow-up:</b> 24 days or until discharge or death</p>                                                                                                                                      | <p><b>Time from symptom onset to drug:</b> mean 7 days</p> <p><b>Oxygen status on admission:</b><br/> Percent on no oxygen: 0%<br/> Percent on low-flow oxygen: 76%<br/> Percent on high-flow oxygen /non-invasive ventilation: 24%<br/> Percent on invasive mechanical ventilation: 0%</p> |
| <p>Abd-Elsalam 2021 (9)</p> <p>Egypt</p> <p>Design: Open-label randomized trial</p> <p>Funding: Not reported</p> <p>Risk of Bias: Low</p> | <p>Intervention: Remdesivir, intravenous, (n=105), 200 mg on day 0 followed by 100 mg on days 1-9</p> <p>Comparator: No study drug (local standard of care) (n=104)</p> <p>Inclusion criteria: 18 to 80 years of age hospitalized with COVID-19 infection confirmed by PCR test and had mild to moderate symptoms</p> <p>Exclusion criteria: History of renal impairment or those with ALT and/or AST levels &gt;5 times the upper limit of normal, pregnant or breastfeeding, allergy or contraindication to remdesivir</p> <p><b>Study Period/Length of Follow-up:</b> 6 months</p> | <p><b>N=209 randomized (200 analyzed)</b><br/> <b>Age (years): 53.5</b><br/> <b>Gender (male): 60%</b><br/> <b>Race: NR</b></p> <p><b>Time from symptom onset to drug:</b><br/> <b>Unclear</b><br/> <b>Oxygen status on admission:</b> Not reported</p>                                     |

ALT = alanine aminotransferase; AST = aspartate aminotransferase; ECMO = extracorporeal membrane oxygenation; eGFR = estimated glomerular filtration rate; IQR = interquartile range; RT-PCR = reverse transcription, polymerase-chain-reaction; SARS-CoV = Severe Acute Respiratory Syndrome Coronavirus-2 infection

\* Indicates newly identified sub-study

**Supplement Table 4. Study Outcomes A**

| Author, Year<br>(ref)                             | Length of hospital stay                                      |                                                              | Time to recovery     |                                   | Mortality                                                |                                           | Recovery or<br>Combined endpoint<br>"Clinical Improvement" |                                                     |
|---------------------------------------------------|--------------------------------------------------------------|--------------------------------------------------------------|----------------------|-----------------------------------|----------------------------------------------------------|-------------------------------------------|------------------------------------------------------------|-----------------------------------------------------|
|                                                   | Remdesivir                                                   | Placebo                                                      | Remdesivir           | Placebo                           | Remdesivir                                               | Placebo                                   | Remdesivir                                                 | Placebo                                             |
| Beigel 2020 (1)<br>ACTT-1                         | Median<br>[IQR]                                              | Median<br>[IQR]                                              | Median<br>[95% CI]   | Median<br>[95% CI]                | 14-day<br>6.5%                                           | 14-day<br>11.7%                           | Day 29<br>Recovery *                                       | Day 29<br>Recovery *                                |
|                                                   | 12 [6 to 28]                                                 | 17 [8 to 28]                                                 | 10 days<br>[9 to 11] | 15 days<br>[13 to 18]             | (35/541)                                                 | (61/521)                                  | 73.8%<br>(399/541)                                         | 67.6%<br>(352/521)                                  |
|                                                   | Difference<br>-5.0 days [95%<br>CI, -7.7 to -2.3]            |                                                              |                      |                                   | HR 0.55 [95%<br>CI, 0.36 to 0.83]<br>(through day<br>15) |                                           | Recovery Rate<br>Ratio 1.29<br>[95% CI, 1.12 to<br>1.49]   |                                                     |
|                                                   | Median [IQR]<br>for those who<br>did not die<br>10 [5 to 21] | Median [IQR]<br>for those who<br>did not die<br>14 [7 to 27] |                      |                                   | 29-day<br>10.9%<br>(59/541)                              | 29-day<br>14.8%<br>(77/521)               | Recovery<br>Mild/mod.<br>Disease †<br>98.2% (54/55)        | Recovery<br>Mild/mod.<br>Disease †<br>92.0% (46/50) |
| Difference<br>-4.0 days [95%<br>CI, -6.0 to -2.0] |                                                              |                                                              |                      | HR 0.73 [95%<br>CI, 0.52 to 1.03] |                                                          | Severe Disease<br>‡<br>71.0%<br>(345/486) | Severe Disease<br>‡<br>65.0%<br>(306/471)                  |                                                     |

|                     |                                                                                                 |                                       |                                                                          |                                                                          |                                                                              |                                |                                                                                                                                                                                                   |                                                                                                       |
|---------------------|-------------------------------------------------------------------------------------------------|---------------------------------------|--------------------------------------------------------------------------|--------------------------------------------------------------------------|------------------------------------------------------------------------------|--------------------------------|---------------------------------------------------------------------------------------------------------------------------------------------------------------------------------------------------|-------------------------------------------------------------------------------------------------------|
| Wang 2020 (2)       | Median [IQR]<br>25 days<br>[16 to 38]<br><br>Difference<br>0.0 days<br>[95% CI, -4.0 to<br>4.0] | Median [IQR]<br>24 days<br>[18 to 36] | Time to Clinical<br>Improvement<br>Median [IQR]<br>21 days<br>[13 to 28] | Time to Clinical<br>Improvement<br>Median [IQR]<br>23 days<br>[15 to 28] | 28-day<br><br>13.9%<br>(22/158)<br><br>ARD 1.1%<br>[95% CI, -8.1 to<br>10.3] | 28-day<br><br>12.8%<br>(10/78) | Day 28<br>Recovery II<br>70.7%<br>(106/150)<br><br>Day 28<br>Clinical<br>improvement §<br>65.2%<br>(103/158)<br><br>ARD 7.5%<br>[95% CI, -5.7 to<br>20.7]<br>HR 1.23<br>[95% CI, 0.87<br>to 1.75] | Day 28<br>Recovery II<br>63.6% (49/77)<br><br>Day 28<br>Clinical<br>improvement §<br>57.7%<br>(45/78) |
| Goldman 2020<br>(3) | <b>Remdesivir<br/>5-day</b>                                                                     | <b>Remdesivir<br/>10-day</b>          | <b>Remdesivir<br/>5-day</b>                                              | <b>Remdesivir<br/>10-day</b>                                             | <b>Remdesivir<br/>5-day</b>                                                  | <b>Remdesivir<br/>10-day</b>   | <b>Remdesivir<br/>5-day</b>                                                                                                                                                                       | <b>Remdesivir<br/>10-day</b>                                                                          |

|                            |            |               |                                                                               |                                                            |                                     |                          |                                                                                                                                                                                                                                                                                      |                                                                                                                     |
|----------------------------|------------|---------------|-------------------------------------------------------------------------------|------------------------------------------------------------|-------------------------------------|--------------------------|--------------------------------------------------------------------------------------------------------------------------------------------------------------------------------------------------------------------------------------------------------------------------------------|---------------------------------------------------------------------------------------------------------------------|
| GS-US-540-5773<br>SIMPLE 1 | NR         | NR            | Median [IQR]<br>10 days<br>[6 to 18]<br><br>HR 0.81<br>[95% CI, 0.64 to 1.04] | Median [IQR]<br>11 days<br>[7 to not possible to estimate] | 14-day<br>8.0%<br>(16/200)<br>P=.70 | 14-day<br>10.7% (21/197) | Day 14<br>Clinical recovery II<br>64.5%<br>(129/200)<br>Baseline-adjusted ARD and p-value<br>-6.3%<br>[95% CI, -15.4 to 2.8];<br>P=.17<br><br>Clinical (≥2-point) improvement ¶<br>64.5%<br>(129/200)<br>Baseline-adjusted ARD and P-value<br>-6.5%<br>[95% CI, -15.7 to 2.8]; P=.16 | Day 14<br>Clinical recovery II<br>53.8%<br>(106/197)<br><br>Clinical (≥2-point) improvement ¶<br>54.3%<br>(107/197) |
| Spinner 2020<br>(4)        | Remdesivir | Standard Care | Remdesivir                                                                    | Standard Care                                              | Remdesivir                          | Standard Care            | Remdesivir                                                                                                                                                                                                                                                                           | Standard Care                                                                                                       |

|                                               |    |    |                                                             |                          |                                                                                                                                                                                                |                            |                                                                                                                                                                                                                                                                                                                                                                                                                                                     |                                                                                                                       |
|-----------------------------------------------|----|----|-------------------------------------------------------------|--------------------------|------------------------------------------------------------------------------------------------------------------------------------------------------------------------------------------------|----------------------------|-----------------------------------------------------------------------------------------------------------------------------------------------------------------------------------------------------------------------------------------------------------------------------------------------------------------------------------------------------------------------------------------------------------------------------------------------------|-----------------------------------------------------------------------------------------------------------------------|
| GS-US-540-5774<br>SIMPLE 2 with standard care | NR | NR | Median [IQR]<br>5 day<br>6 (5-10)<br><br>10 day<br>8 (4-13) | Median [IQR]<br>7 (4-14) | 11-day<br><br>5-day<br>0% (0/191)<br>10-day<br>1.0% (2/193)<br>HR for 5-day vs. standard care<br>0.51 [95% CI, 0.09 to 2.80]<br>HR for 10-day vs. standard care<br>0.76 [95% CI, 0.17 to 3.40] | 11-day<br><br>2.0% (4/200) | Day 11 Recovery II<br>5-day<br>73.8% (141/191)<br>10-day<br>68.4% (132/193)<br>HR for 5-day vs. standard care<br>1.18 [95% CI, 0.96 to 1.45]<br>HR for 10-day vs. standard care<br>1.11 [95% CI, 0.90 to 1.36]<br><br>Clinical (≥2-point) improvement ¶<br>5-day<br>70.2% (134/191)<br>10-day<br>65.3% (126/193)<br>HR for 5-day vs. standard care<br>1.15 [95% CI, 0.93 to 1.42]<br>HR for 10-day vs. standard care<br>1.16 [95% CI, 0.93 to 1.43] | Day 11 Recovery II<br>64.0% (128/200)<br><br><br><br><br><br><br>Clinical (≥2-point) improvement ¶<br>60.5% (121/200) |
|-----------------------------------------------|----|----|-------------------------------------------------------------|--------------------------|------------------------------------------------------------------------------------------------------------------------------------------------------------------------------------------------|----------------------------|-----------------------------------------------------------------------------------------------------------------------------------------------------------------------------------------------------------------------------------------------------------------------------------------------------------------------------------------------------------------------------------------------------------------------------------------------------|-----------------------------------------------------------------------------------------------------------------------|

|                            |                                       |                                       |    |    |                                               |                     |    |    |
|----------------------------|---------------------------------------|---------------------------------------|----|----|-----------------------------------------------|---------------------|----|----|
| WHO Solidarity<br>2020 (3) | Still hospitalized<br>at day 7<br>69% | Still hospitalized<br>at day 7<br>59% | NR | NR | 12.5%<br>(301/2743)                           | 12.7%<br>(303/2708) | NR | NR |
|                            |                                       |                                       |    |    | Rate Ratio:<br>0.95 [95% CI,<br>0.81 to 1.11] |                     |    |    |

|                                  |                                             |                                             |                                                                                                                       |                                                                                                                       |                                                                 |                                                                 |                               |                               |
|----------------------------------|---------------------------------------------|---------------------------------------------|-----------------------------------------------------------------------------------------------------------------------|-----------------------------------------------------------------------------------------------------------------------|-----------------------------------------------------------------|-----------------------------------------------------------------|-------------------------------|-------------------------------|
| <b>DisCoVeRy<br/>2021 (8) **</b> | <b>Still<br/>hospitalized at<br/>day 15</b> | <b>Still<br/>hospitalized at<br/>day 15</b> | <b>Days to<br/>Improvement<br/>of 2 categories<br/>of the 7-point<br/>ordinal scale<br/>or hospital<br/>discharge</b> | <b>Days to<br/>Improvement<br/>of 2 categories<br/>of the 7-point<br/>ordinal scale<br/>or hospital<br/>discharge</b> | <b>Overall<br/>At day 29</b>                                    | <b>Overall<br/>At day 29</b>                                    | <b>Day 29<br/>Recovery ††</b> | <b>Day 29<br/>Recovery ††</b> |
|                                  | 49.0%<br>(203/414)                          | 45.2%<br>(189/418)                          | 12 [8 to 24]                                                                                                          | 11 [7 to 26]                                                                                                          | 8.2%<br>(34/414)                                                | 8.9%<br>(37/418)                                                | 64% (265/414)                 | 57.7%<br>(241/418)            |
|                                  | <b>Still<br/>hospitalized at<br/>day 29</b> | <b>Still<br/>hospitalized at<br/>day 29</b> | <b>within 29 days<br/>Median [IQR]</b>                                                                                | <b>within 29 days<br/>Median [IQR]</b>                                                                                | <b>Moderate<br/>disease</b>                                     | <b>Moderate<br/>disease</b>                                     |                               |                               |
|                                  | 27.8%<br>(115/414)                          | 33.3%<br>(139/418)                          |                                                                                                                       |                                                                                                                       | 5.9% (15/253)                                                   | 6.0% (15/251)                                                   |                               |                               |
|                                  |                                             |                                             |                                                                                                                       |                                                                                                                       | <b>Severe<br/>disease</b>                                       | <b>Severe<br/>disease</b>                                       |                               |                               |
|                                  |                                             |                                             |                                                                                                                       |                                                                                                                       | 11.8% (19/161)                                                  | 13.2% (22/167)                                                  |                               |                               |
|                                  |                                             |                                             |                                                                                                                       |                                                                                                                       | <b>Unique<br/>patients<br/>(no overlap<br/>with Solidarity)</b> | <b>Unique<br/>patients<br/>(no overlap<br/>with Solidarity)</b> |                               |                               |
|                                  |                                             |                                             |                                                                                                                       |                                                                                                                       | <b>At day 29</b>                                                | <b>At day 29</b>                                                |                               |                               |
|                                  |                                             |                                             |                                                                                                                       |                                                                                                                       | 8.2%<br>(16/195)                                                | 10.2%<br>(20/197)                                               |                               |                               |
|                                  |                                             |                                             |                                                                                                                       |                                                                                                                       | <b>Moderate<br/>disease</b>                                     | <b>Moderate<br/>disease</b>                                     |                               |                               |
|                                  |                                             |                                             |                                                                                                                       |                                                                                                                       | 3.6% (4/112)                                                    | 8.1% (9/111)                                                    |                               |                               |
|                                  |                                             |                                             |                                                                                                                       |                                                                                                                       | <b>Severe<br/>disease</b>                                       | <b>Severe<br/>disease</b>                                       |                               |                               |
|                                  |                                             |                                             |                                                                                                                       |                                                                                                                       | 14.5% (12/83)                                                   | 12.8% (11/86)                                                   |                               |                               |

|                                                                            |                                                               |                                                                |                                                                                                                                           |           |                                                                                                                                                                                                                                                                                                                                                         |                                                                                    |           |           |
|----------------------------------------------------------------------------|---------------------------------------------------------------|----------------------------------------------------------------|-------------------------------------------------------------------------------------------------------------------------------------------|-----------|---------------------------------------------------------------------------------------------------------------------------------------------------------------------------------------------------------------------------------------------------------------------------------------------------------------------------------------------------------|------------------------------------------------------------------------------------|-----------|-----------|
| <b>NOR-Solidarity<br/>2021 (7)<br/>Sub-study of<br/>WHO<br/>Solidarity</b> | <b>NR</b>                                                     | <b>NR</b>                                                      | <b>NR</b>                                                                                                                                 | <b>NR</b> | <b>In-hospital<br/>7.1%<br/>RR 1.0 [95%<br/>CI, 0.2 to 4.6]<br/><br/>HR 1.0 [95%<br/>CI, 0.4 to 2.9]<br/><br/>28 day<br/>2.4%<br/>Estimated<br/>Marginal Risk<br/>Difference vs.<br/>SC<br/>-2.9% [95% CI,<br/>-10.3 to 4.5]<br/><br/>60 day<br/>7.1%<br/>Estimated<br/>Marginal Risk<br/>Difference vs.<br/>SC<br/>1.9% [95% CI,<br/>-7.8 to 11.6]</b> | <b>In-hospital<br/>7.0%<br/><br/><br/>28 day<br/>5.3%<br/><br/>60 day<br/>5.3%</b> | <b>NR</b> | <b>NR</b> |
| Mahajan 2021<br>(6)                                                        | NR                                                            | NR                                                             | Patients in the remdesivir group and standard of care group had an equal time to recovery between 10 and 20 days (no other data reported) | NR        | All patients<br>14.6% (6/41)<br><br>Per protocol<br>Day 12-24<br>14.7%<br>(5/34)                                                                                                                                                                                                                                                                        | All patients<br>12.2% (5/41)<br><br>Per Protocol<br>Day 12-24<br>8.3%<br>(3/36)    | NR        | NR        |
| Abd-Elsalam<br>2021 (9)                                                    | Mean<br>12.4 days<br><br>Median [IQR]<br>10 days<br>[8 to 14] | Mean<br>16.7 days<br><br>Median [IQR]<br>16 days<br>[12 to 21] | NR                                                                                                                                        | NR        | 9%<br>(9/100)                                                                                                                                                                                                                                                                                                                                           | 7%<br>(7/100)                                                                      | NR        | NR        |

ARD = absolute risk difference; CI =confidence intervals; HR = Hazard ratio; IQR = interquartile range; NR = not reported; OR = odds ratio; RR = relative risk; SC = standard care

\* Defined by either discharge from the hospital or hospitalization extended for purposes of infection-control only with no medical needs.

† Mild/moderate disease was defined by a SpO<sub>2</sub> >94% and respiratory rate <24 breaths per minute without supplemental oxygen requirement.

‡ Severe disease was defined as participants meeting one or more of the following criteria: requiring invasive or non-invasive mechanical ventilation, requiring supplemental oxygen, an SpO<sub>2</sub> ≤94% on room air, or respiratory rate ≥24 breaths per minute.

§ Defined as a two-point reduction in patients' admission status on a six-point ordinal scale, or live discharge from the hospital, whichever came first. The six-point scale was as follows: death=6; hospital admission for extracorporeal membrane oxygenation or mechanical ventilation=5; hospital admission for noninvasive ventilation or high-flow oxygen therapy=4; hospital admission for oxygen therapy (but not requiring high-flow or non-invasive ventilation)=3; hospital admission but not requiring oxygen therapy=2; and discharged or having reached discharge criteria (defined as clinical recovery - ie, normalization of pyrexia, respiratory rate <24 breaths per minute, saturation of peripheral oxygen >94% on room air, and relief of cough, all maintained for at least 72 h)=1 within 28 days after randomization

|| Patients achieved clinical recovery if they no longer required oxygen support and medical care or were discharged from the hospital (improvement from a baseline score of 2 to 5 to a score of 6 or 7).

¶ Clinical improvement was defined as an improvement of two or more points from baseline on a predefined seven-point scale consisting of the following categories: 1, death; 2, hospitalized, receiving invasive mechanical ventilation or ECMO; 3, hospitalized, receiving noninvasive ventilation or high-flow oxygen devices; 4, hospitalized, requiring low-flow supplemental oxygen; 5, hospitalized, not requiring supplemental oxygen but receiving ongoing medical care (related or not related to Covid-19); 6, hospitalized, requiring neither supplemental oxygen nor ongoing medical care (other than that specified in the protocol for remdesivir administration); and 7, not hospitalized.

\*\* Sub-study of WHO Solidarity with additional newer recruited patients not included in WHO Solidarity study results.

†† Defined by review authors as items 1 and 2 on a seven-point ordinal scale: 1=not hospitalized, no limitations on activities; and 2= not hospitalized, limitation on activities.

**Supplement Table 5. Study Outcomes B**

| Author, Year (ref)                             | Required invasive mechanical ventilation;<br>Duration of invasive mechanical ventilation, days                                                                                                                                                                                                           |                                                                                                                                                                                                   | Required oxygen;<br>Duration of oxygen support, days                                                                                                                                                                                                                                                     |                                                                                                                                                                                                  |
|------------------------------------------------|----------------------------------------------------------------------------------------------------------------------------------------------------------------------------------------------------------------------------------------------------------------------------------------------------------|---------------------------------------------------------------------------------------------------------------------------------------------------------------------------------------------------|----------------------------------------------------------------------------------------------------------------------------------------------------------------------------------------------------------------------------------------------------------------------------------------------------------|--------------------------------------------------------------------------------------------------------------------------------------------------------------------------------------------------|
|                                                | Remdesivir                                                                                                                                                                                                                                                                                               | Placebo                                                                                                                                                                                           | Remdesivir                                                                                                                                                                                                                                                                                               | Placebo                                                                                                                                                                                          |
| Beigel 2020 (1) ACTT-1                         | 17.6% (95/541) at Day 15 visit;<br><br>Length of use if receiving at baseline,<br>Median [IQR]<br>17 days [9 to 28]<br>Difference<br>-3.0 days<br>[95% CI, -9.3 to 3.3]<br><br>Length of new use during study,<br>Median [IQR]<br>21.5 days [9 to 28]<br>Difference<br>1.0 days<br>[95% CI, -6.0 to 8.0] | 23.2% (121/521) at Day 15 visit;<br><br>Length of use if receiving at baseline,<br>Median [IQR]<br>20 days [8 to 28]<br><br>Length of new use during study,<br>Median [IQR]<br>23 days [12 to 28] | 10.7% (58/541) at Day 15 visit;<br><br>Length of use if receiving at baseline,<br>Median [IQR]<br>13 days [5 to 28]<br>Difference<br>-8.0 days<br>[95% CI, -11.8 to -4.2]<br><br>Length of new use during study,<br>Median [IQR]<br>4 days [2 to 12]<br>Difference<br>-1.0 days<br>[95% CI, -7.6 to 5.6] | 11.5% (60/521) at Day 15 visit;<br><br>Length of use if receiving at baseline,<br>Median [IQR]<br>21 days [8 to 28]<br><br>Length of new use during study,<br>Median [IQR]<br>5.5 days [1 to 15] |
| Wang 2020 (2)                                  | 8.2% (13/158)<br>Median [IQR]<br>7.0 days<br>[4 to 16]<br>Difference<br>-4.0 days<br>[95% CI, -14.0 to 2.0]                                                                                                                                                                                              | 12.8% (10/78)<br>Median [IQR]<br>15.5 days<br>[6 to 21]                                                                                                                                           | Median [IQR]<br>19.0 days<br>[11 to 30]<br>Difference<br>-2.0 days<br>[95% CI, -6.0 to 1.0]                                                                                                                                                                                                              | Median [IQR]<br>21.0 days<br>[14 to 30.5]                                                                                                                                                        |
| Goldman 2020 (3)<br>GS-US-540-5773<br>SIMPLE 1 | <b>Remdesivir<br/>5-day</b><br>8.0% (16/200); Duration NR                                                                                                                                                                                                                                                | <b>Remdesivir<br/>10-day</b><br>16.8% (33/197); Duration NR                                                                                                                                       | <b>Remdesivir<br/>5-day</b><br>NR                                                                                                                                                                                                                                                                        | <b>Remdesivir<br/>10-day</b><br>NR                                                                                                                                                               |
| Spinner 2020 (4)                               | <b>Remdesivir</b>                                                                                                                                                                                                                                                                                        | <b>Standard Care</b>                                                                                                                                                                              | <b>Remdesivir</b>                                                                                                                                                                                                                                                                                        | <b>Standard Care</b>                                                                                                                                                                             |

|                                                                        |                                                                                                                                                                                                                                                              |                                                                                                                                                                                                                                                              |                                                                                                                                                           |                                                                                                                                                           |
|------------------------------------------------------------------------|--------------------------------------------------------------------------------------------------------------------------------------------------------------------------------------------------------------------------------------------------------------|--------------------------------------------------------------------------------------------------------------------------------------------------------------------------------------------------------------------------------------------------------------|-----------------------------------------------------------------------------------------------------------------------------------------------------------|-----------------------------------------------------------------------------------------------------------------------------------------------------------|
| GS-US-540-5774<br>SIMPLE 2 with<br>standard care                       | 5-day<br>0% (0/191)<br><br>10-day<br>0.5% (1/193)                                                                                                                                                                                                            | 2.0% (4/200)                                                                                                                                                                                                                                                 | Time to Room Air<br>Median [IQR]<br>5-day<br>5 (3-7)<br>10-day<br>4 (2-6)                                                                                 | 6 (4-14)                                                                                                                                                  |
|                                                                        |                                                                                                                                                                                                                                                              |                                                                                                                                                                                                                                                              | 6.3% (12/191) and 6.7%<br>(13/193) required oxygen<br>support on Day 1                                                                                    | 11% (22/200) required<br>oxygen support on Day 1                                                                                                          |
| WHO Solidarity 2020<br>(5)                                             | <b>Remdesivir</b><br><br>Initiation of ventilation in those<br>not already ventilated<br><br>11.9% (295/2489)                                                                                                                                                | <b>Standard Care</b><br><br>Initiation of ventilation in<br>those not already ventilated<br><br>11.5% (284/2475)                                                                                                                                             | <b>Remdesivir</b><br><br>NR                                                                                                                               | <b>Standard Care</b><br><br>NR                                                                                                                            |
| <b>DisCoVeRy 2021 (8) *</b>                                            | <b>6.3% (26/414) at Day 29</b><br><br><b>15.0% (62/414) at Day 15</b><br><br>Initiation of ventilation in those<br>not already ventilated<br><b>Unique patients</b><br><b>(no overlap with Solidarity)</b><br><b>Within 29 days</b><br><b>15.7% (27/172)</b> | <b>9.8% (41/418) at Day 29</b><br><br><b>18.9% (79/418) at Day 15</b><br><br>Initiation of ventilation in<br>those not already ventilated<br><b>Unique patients</b><br><b>(no overlap with Solidarity)</b><br><b>Within 29 days</b><br><b>29.9% (52/174)</b> | <b>Required supplemental<br/>oxygen or non-invasive<br/>ventilation or HFNO</b><br><b>10.1% (42/414) at Day 29</b><br><br><b>22.0% (91/414) at Day 15</b> | <b>Required supplemental<br/>oxygen or non-invasive<br/>ventilation or HFNO</b><br><b>11.5% (48/418) at Day 29</b><br><br><b>19.4% (81/418) at Day 15</b> |
| <b>NOR-Solidarity 2021<br/>(7)<br/>Sub-study of WHO<br/>Solidarity</b> | <b>9.5%</b><br><b>Estimated Marginal Risk</b><br><b>Difference vs. SC</b><br><b>2.5% [95% CI, -8.6 to 13.6]</b>                                                                                                                                              | <b>7.0%</b>                                                                                                                                                                                                                                                  | <b>NR</b>                                                                                                                                                 | <b>NR</b>                                                                                                                                                 |
| Mahajan 2021 (6)                                                       | Day 12-24<br>11.8%<br>(4/34)                                                                                                                                                                                                                                 | Day 12-24<br>5.6%<br>(2/36)                                                                                                                                                                                                                                  | Day 12-24<br>Supplemental O <sub>2</sub><br>11.8%<br>(4/34)                                                                                               | Day 12-24<br>Supplemental O <sub>2</sub><br>16.7%<br>(6/36)                                                                                               |
|                                                                        |                                                                                                                                                                                                                                                              |                                                                                                                                                                                                                                                              | Day 12-24                                                                                                                                                 | Day 12-24                                                                                                                                                 |

|                      |                                                                                               |                                                                                             | High-flow O <sub>2</sub> or/<br>non-invasive ventilation<br>55.9%<br>(19/34) | High-flow O <sub>2</sub> or/<br>non-invasive ventilation<br>61.1%<br>(22/36) |
|----------------------|-----------------------------------------------------------------------------------------------|---------------------------------------------------------------------------------------------|------------------------------------------------------------------------------|------------------------------------------------------------------------------|
| Abd-Elsalam 2021 (9) | Initiation of mechanical<br>ventilation in those not already<br>ventilated<br>11%<br>(11/100) | Initiation of mechanical<br>ventilation in those not<br>already ventilated<br>8%<br>(8/100) | NR                                                                           | NR                                                                           |

ECMO = extracorporeal membrane oxygenation; HFNO = high flow nasal oxygen; IQR = interquartile range; NR = not reported; SC = standard care  
 \* Sub-study of WHO Solidarity with additional newer recruited patients not included in WHO Solidarity study results

**Supplement Table 6. Viral Load**

| Author, Year (ref)<br>Viral load definition                                                | Pre                                                            |                                                                | Post                                                                                                                                                                                                                                                                             |                                                                |
|--------------------------------------------------------------------------------------------|----------------------------------------------------------------|----------------------------------------------------------------|----------------------------------------------------------------------------------------------------------------------------------------------------------------------------------------------------------------------------------------------------------------------------------|----------------------------------------------------------------|
|                                                                                            | Remdesivir                                                     | Placebo                                                        | Remdesivir                                                                                                                                                                                                                                                                       | Placebo                                                        |
| Beigel 2020 (1)<br>ACTT-1                                                                  | NR                                                             | NR                                                             | NR                                                                                                                                                                                                                                                                               | NR                                                             |
| Wang 2020 (2)<br><i>Mean baseline viral load of nasopharyngeal and oropharyngeal swabs</i> | 4.7 log <sub>10</sub> copies/mL                                | 4.7 log <sub>10</sub> copies per mL                            | NR                                                                                                                                                                                                                                                                               | NR                                                             |
| <i>Upper respiratory tract specimens</i>                                                   | <i>Estimated from graph</i><br>3.7 log <sub>10</sub> copies/mL | <i>Estimated from graph</i><br>3.6 log <sub>10</sub> copies/mL | <i>Estimated from graph</i><br>0.6 log <sub>10</sub> copies/mL                                                                                                                                                                                                                   | <i>Estimated from graph</i><br>0.1 log <sub>10</sub> copies/mL |
| <i>Lower respiratory tract specimens</i>                                                   | <i>Estimated from graph</i><br>7.3 log <sub>10</sub> copies/mL | <i>Estimated from graph</i><br>6.4 log <sub>10</sub> copies/mL | <i>Estimated from graph</i><br>1.4 log <sub>10</sub> copies/mL                                                                                                                                                                                                                   | <i>Estimated from graph</i><br>0.0 log <sub>10</sub> copies/mL |
| Goldman 2020 (3)<br>GS-US-540-5773<br>SIMPLE 1                                             | <b>Remdesivir 5-day</b><br>NR                                  | <b>Remdesivir 10-day</b><br>NR                                 | <b>Remdesivir 5-day</b><br>NR                                                                                                                                                                                                                                                    | <b>Remdesivir 10-day</b><br>NR                                 |
| Spinner 2020 (4)<br>GS-US-540-5774<br>SIMPLE 2 with standard care                          | <b>Remdesivir</b><br>NR                                        | <b>Standard Care</b><br>NR                                     | <b>Remdesivir</b><br>NR                                                                                                                                                                                                                                                          | <b>Standard Care</b><br>NR                                     |
| WHO Solidarity 2020 (5)                                                                    | <b>Remdesivir</b><br>NR                                        | <b>Standard Care</b><br>NR                                     | <b>Remdesivir</b><br>NR                                                                                                                                                                                                                                                          | <b>Standard Care</b><br>NR                                     |
| <i>DisCoVeRy 2021 (8) *<br/>nasopharyngeal swab</i>                                        | <b>Median</b><br>3.2 log <sub>10</sub> copies/<br>10,000 cells | <b>Median</b><br>3.2 log <sub>10</sub> copies/<br>10,000 cells | <b>Least mean square difference in viral load at day 14,</b><br>-0.004 log <sub>10</sub> copies/10,000 cells<br>[95% CI, -0.031 to 0.022]<br>P=.75                                                                                                                               |                                                                |
| <i>NOR-Solidarity 2021 (7)<br/>Sub-study of WHO Solidarity oropharynx</i>                  | <b>1.6 (1.6)</b><br><b>log<sub>10</sub> copies/1000 cells</b>  | <b>2.3 (1.8)</b><br><b>log<sub>10</sub> copies/1000 cells</b>  | <b>Difference in viral level at day 10,</b><br><b>0.203 log<sub>10</sub> copies/1000 cells</b><br><b>[95% CI, -0.348 to 0.754]</b><br><br><b>Difference in daily viral decrease rate,</b><br><b>0.113 log<sub>10</sub> copies/1000 cells</b><br><b>[95% CI, -0.001 to 0.227]</b> |                                                                |

|                      |    |    |    |    |
|----------------------|----|----|----|----|
| Mahajan 2021 (6)     | NR | NR | NR | NR |
| Abd-Elsalam 2021 (9) | NR | NR | NR | NR |

NR = not reported

\* Sub-study of WHO Solidarity with additional newer recruited patients not included in WHO Solidarity study results

**Supplement Table 7. Harms A (Number of Subjects Reporting at Least One Event)**

| Author, Year (ref)                                                   | Serious AE                        |                                    | AE leading to drug withdrawal     |                                    | Any AE                              |                                    |
|----------------------------------------------------------------------|-----------------------------------|------------------------------------|-----------------------------------|------------------------------------|-------------------------------------|------------------------------------|
|                                                                      | Remdesivir                        | Placebo                            | Remdesivir                        | Placebo                            | Remdesivir                          | Placebo                            |
| Beigel 2020 (1)<br>ACTT-1                                            | 24.6%<br>(131/532) *              | 31.6%<br>(163/516) *               | 10.7%<br>(57/532) *               | 14.9%<br>(77/516) *                | 57.3% (305/532) <sup>a</sup>        | 62.6% (323/516) <sup>a</sup>       |
|                                                                      | <i>Study-related</i><br>2 events  | <i>Study-related</i><br>3 events   |                                   |                                    |                                     |                                    |
|                                                                      | Grade 3 or 4<br>51.3% (273/532)   | Grade 3 or 4<br>57.2% (295/516)    |                                   |                                    |                                     |                                    |
| Wang 2020 (2)                                                        | 18.1%<br>(28/155)                 | 25.6%<br>(20/78)                   | 11.6%<br>(18/155)                 | 5.1%<br>(4/78)                     | 65.8%<br>(102/155)                  | 64.1%<br>(50/78)                   |
|                                                                      | Grade 3 or 4<br>5.8% (9/155)      | Grade 3 or 4<br>12.8% (10/78)      |                                   |                                    | Grade 3 or 4<br>8.4% (13/155)       | Grade 3 or 4<br>14.1% (11/78)      |
| Goldman 2020 (3)<br>GS-US-540-5773<br>SIMPLE 1                       | <b>Remdesivir</b><br><b>5-day</b> | <b>Remdesivir</b><br><b>10-day</b> | <b>Remdesivir</b><br><b>5-day</b> | <b>Remdesivir</b><br><b>10-day</b> | <b>Remdesivir</b><br><b>5-day</b>   | <b>Remdesivir</b><br><b>10-day</b> |
|                                                                      | 21.0% (42/200)                    | 34.5% (68/197)                     | 4.5%<br>(9/200)<br>P=.07          | 10.2%<br>(20/197)                  | 70.5%<br>(141/200)<br>P=.86         | 73.6%<br>(145/197)                 |
|                                                                      |                                   |                                    |                                   |                                    | Grade ≥3<br>30% (60/200)            | Grade ≥3<br>43% (85/197)           |
| Spinner 2020 (4)<br>GS-US-540-5774<br>SIMPLE 2 with<br>standard care | <b>Remdesivir</b>                 | <b>Standard Care</b>               | <b>Remdesivir</b>                 | <b>Standard Care</b>               | <b>Remdesivir</b>                   | <b>Standard Care</b>               |
|                                                                      | 5-day<br>4.7% (9/191)             | 9.0% (18/200)                      | 5-day<br>2.1% (4/191)             | NA                                 | 5-day<br>51.3% (98/191)             | 46.5% (93/200)                     |
|                                                                      | 10-day<br>5.2% (10/193)           |                                    | 10-day<br>4.1% (8/193)            |                                    | 10-day<br>58.5% (113/193)           |                                    |
|                                                                      |                                   |                                    |                                   |                                    | Grade ≥3<br>5-day<br>10.5% (20/191) | Grade ≥3<br>12.0% (24/200)         |
|                                                                      |                                   |                                    |                                   |                                    | 10-day                              |                                    |

|                                                            |                                       |                        |                                                |                      |                        |                        |
|------------------------------------------------------------|---------------------------------------|------------------------|------------------------------------------------|----------------------|------------------------|------------------------|
|                                                            |                                       |                        |                                                |                      | 12% (24/193)           |                        |
| WHO Solidarity 2020 (5)                                    | <b>Remdesivir</b>                     | <b>Standard Care</b>   | <b>Remdesivir</b>                              | <b>Standard Care</b> | <b>Remdesivir</b>      | <b>Standard Care</b>   |
|                                                            | NR                                    | NR                     | NR                                             | NR                   | NR                     | NR                     |
| <b>DisCoVeRy 2021 (8) †</b>                                | <b>33.3% (135/406)</b>                | <b>31.1% (130/418)</b> | <b>NR</b>                                      | <b>NR</b>            | <b>59.4% (241/406)</b> | <b>56.5% (236/418)</b> |
| <b>NOR-Solidarity 2021 (7) Sub-study of WHO Solidarity</b> | <b>19.0% (8/42)</b><br><b>P=.56 ‡</b> | <b>14.9% (13/87)</b>   | <b>0% (0/42)</b>                               | <b>0% (0/87)</b>     | <b>38.5% (20/42)</b>   | <b>25.3% (22/87)</b>   |
| Mahajan 2021 (6)                                           | NR                                    | NR                     | 7.3% (3/41) due to abnormal ALT and AST values | 0/41                 | NR                     | NR                     |
| Abd-Elsalam 2021 (9)                                       | 0% (0/100)                            | 0% (0/100)             | 0% (0/100)                                     | 0% (0/100)           | NR                     | NR                     |

AE = adverse event; ALT = alanine aminotransferase; AST = aspartate aminotransferase; NR = not reported

\* Data for the treated population

† Sub-study of WHO Solidarity with additional newer recruited patients not included in published WHO Solidarity study results

‡ P-value calculated by review team

**Supplement Table 8. Harms B (Number of Subjects Reporting at Least One Event)**

| Author, Year                                                     | Respiratory failure or acute respiratory distress syndrome                      |                                                                              | Cardiopulmonary failure |                          |
|------------------------------------------------------------------|---------------------------------------------------------------------------------|------------------------------------------------------------------------------|-------------------------|--------------------------|
|                                                                  | Remdesivir                                                                      | Placebo                                                                      | Remdesivir              | Placebo                  |
| Beigel 2020(1)<br>ACTT-1                                         | Serious respiratory failure<br>7.3%<br>(39/532) *                               | Serious respiratory failure<br>8.0%<br>(66/516) *                            | NR                      | NR                       |
|                                                                  | Respiratory distress<br>1.1% (6/532) *                                          | Respiratory distress<br>2.1% (11/516) *                                      |                         |                          |
| Wang 2020(2)                                                     | Respiratory failure or acute respiratory distress syndrome<br>10.3%<br>(16/155) | Respiratory failure or acute respiratory distress syndrome<br>7.7%<br>(6/78) | 5.2%<br>(8/155)         | 9.0%<br>(7/78)           |
|                                                                  | Grade 3 or 4<br>2.6% (4/155)                                                    | Grade 3 or 4<br>5.1% (4/78)                                                  |                         |                          |
| Goldman 2020(3)<br>GS-US-540-5773<br>SIMPLE 1                    | <b>Remdesivir 5-day</b>                                                         | <b>Remdesivir 10-day</b>                                                     | <b>Remdesivir 5-day</b> | <b>Remdesivir 10-day</b> |
|                                                                  | 6.0%<br>(12/200)                                                                | 10.7%<br>(21/197)                                                            | NR                      | NR                       |
| Spinner 2020(4)<br>GS-US-540-5774<br>SIMPLE 2 with standard care | <b>Remdesivir</b>                                                               | <b>Standard Care</b>                                                         | <b>Remdesivir</b>       | <b>Standard Care</b>     |
|                                                                  | NR                                                                              | NR                                                                           | NR                      | NR                       |
| Pan 2020(5)<br>WHO Solidarity<br><i>Interim results</i>          | <b>Remdesivir</b>                                                               | <b>Standard Care</b>                                                         | <b>Remdesivir</b>       | <b>Standard Care</b>     |
|                                                                  | NR                                                                              | NR                                                                           | NR                      | NR                       |
| <b>DisCoVeRy 2021 (8)</b><br><b>†</b>                            | <b>Acute respiratory distress syndrome</b>                                      | <b>Acute respiratory distress syndrome</b>                                   | <b>NR</b>               | <b>NR</b>                |

|                                                                      |                                                                                                                          |                                                                                                                           |           |           |
|----------------------------------------------------------------------|--------------------------------------------------------------------------------------------------------------------------|---------------------------------------------------------------------------------------------------------------------------|-----------|-----------|
|                                                                      | <b>8.6%</b><br><b>(35/406)</b><br><b>Acute</b><br><b>respiratory</b><br><b>failure</b><br><b>7.4%</b><br><b>(30/406)</b> | <b>8.9%</b><br><b>(37/418)</b><br><b>Acute</b><br><b>respiratory</b><br><b>failure</b><br><b>11.2%</b><br><b>(47/418)</b> |           |           |
| <b>NOR-Solidarity 2021 (7)</b><br><b>Sub-study of WHO Solidarity</b> | <b>NR</b>                                                                                                                | <b>NR</b>                                                                                                                 | <b>NR</b> | <b>NR</b> |
| Mahajan 2021 (6)                                                     | NR                                                                                                                       | NR                                                                                                                        | NR        | NR        |
| Abd-Elsalam 2021 (9)                                                 | NR                                                                                                                       | NR                                                                                                                        | NR        | NR        |

AE = adverse event; NR = not reported

\*Data for the treated population

**Supplement Table 9. Risk of Bias of studies**

| <b>Author, Year (ref)</b>                      | <b>Random sequence generation</b>                    | <b>Allocation concealment</b> | <b>Blinding *</b>                                                                                         | <b>Incomplete outcome data †</b>                                                                                                                 | <b>Selective outcome reporting ‡</b> | <b>Overall Risk of Bias §</b>                                                                                                                                                                                         |
|------------------------------------------------|------------------------------------------------------|-------------------------------|-----------------------------------------------------------------------------------------------------------|--------------------------------------------------------------------------------------------------------------------------------------------------|--------------------------------------|-----------------------------------------------------------------------------------------------------------------------------------------------------------------------------------------------------------------------|
| Beigel 2020 (1)<br>ACTT-1                      | Low, adequate, permuted randomization sequence       | Low, adequate, web-based      | Low, patient, provider<br><br>Follow-up safety and efficacy evaluations performed by blinded clinic staff | Low, 1 placebo patient and 3 remdesivir patients excluded due to no data after baseline.                                                         | No                                   | Low                                                                                                                                                                                                                   |
| Wang 2020 (2)<br><br>Note: trial stopped early | Low, adequate, permuted block randomization sequence | Low, adequate, centralized    | Low, patient, provider                                                                                    | Low, 1 placebo patient withdrew consent, not in ITT analyses.<br>Three remdesivir patients did not take drug and are not in the safety analyses. | No                                   | Low                                                                                                                                                                                                                   |
| Goldman 2020 (3)<br>GS-US-540-5773<br>SIMPLE 1 | Low, adequate, computer generated                    | Low, adequate, web-based      | Open-label<br><br>Outcome assessors were not blinded.                                                     | Low, 2 patients in the 5-day group and 3 in the 10-day group not included in analyses (withdrawn or randomized in error)                         | No                                   | Moderate based on imbalance between groups (patients randomly assigned to the 10-day group had significantly worse clinical status than those assigned to the 5-day group (P = 0.02)) and open label nature of study. |
| Spinner 2020 (4)<br>GS-US-540-5774             | Low, adequate, computer generated                    | Low, adequate, web-based      | Open-label                                                                                                | Low, 8 patients in the 5-day group and 4 in the 10-day group not                                                                                 | No                                   | Low                                                                                                                                                                                                                   |

| Author, Year (ref)                      | Random sequence generation                    | Allocation concealment                                                      | Blinding *                                                       | Incomplete outcome data †                                                                                                                                                                    | Selective outcome reporting ‡                                                        | Overall Risk of Bias §                                                         |
|-----------------------------------------|-----------------------------------------------|-----------------------------------------------------------------------------|------------------------------------------------------------------|----------------------------------------------------------------------------------------------------------------------------------------------------------------------------------------------|--------------------------------------------------------------------------------------|--------------------------------------------------------------------------------|
| SIMPLE 2 with standard care             |                                               |                                                                             | Outcome assessors were not blinded.                              | included in analyses (did not start treatment)                                                                                                                                               |                                                                                      |                                                                                |
| WHO Solidarity 2020 (5)                 | WHO: Unclear, not reported;                   | WHO: Low, adequate, cloud-based;                                            | Open-label<br><br>Blinded analyses of all relevant data          | WHO: Low, 7 patients in remdesivir and 17 patients in control group not included in analyses (no or uncertain consent to follow-up)                                                          | WHO: Yes – limited reporting of hospitalization duration; no adverse event reporting | Moderate based on unclear sequence generation and selective outcomes reporting |
| <b>Sub-studies of WHO Solidarity</b>    |                                               |                                                                             |                                                                  |                                                                                                                                                                                              |                                                                                      |                                                                                |
| <i>DisCoVeRy 2021 (8) II</i>            | <i>Low, computer randomization procedures</i> | <i>Low, electronic case report form</i>                                     | <i>Open-label<br/><br/>Blinded analyses of all relevant data</i> | <i>Low, 12 patients in remdesivir and 10 patients in control group not included in analyses (no or uncertain informed consent or no confirmed positive PCR ≤9 days before randomization)</i> | <i>No</i>                                                                            | <i>Low</i>                                                                     |
| <i>(NOR-Solidarity – sub-study) (7)</i> | <i>Low, computer randomization procedures</i> | <i>Low, allocation sequence was prepared by an independent statistician</i> | <i>Open-label<br/><br/>Blinded analyses of all relevant data</i> | <i>2% patients not included in full analysis set, 18% did not complete 3-month follow-up</i>                                                                                                 | <i>No</i>                                                                            | <i>Low</i>                                                                     |
| Mahajan 2021 (6)                        | Low, adequate, computer generated             | Unclear, not reported                                                       | Open-label                                                       | High, 8 patients in remdesivir and 5                                                                                                                                                         | No                                                                                   | High based on not using ITT analysis,                                          |

| Author, Year (ref)   | Random sequence generation        | Allocation concealment                                                                       | Blinding * | Incomplete outcome data †                                                                                                                                                                                                                 | Selective outcome reporting ‡                 | Overall Risk of Bias §                                          |
|----------------------|-----------------------------------|----------------------------------------------------------------------------------------------|------------|-------------------------------------------------------------------------------------------------------------------------------------------------------------------------------------------------------------------------------------------|-----------------------------------------------|-----------------------------------------------------------------|
|                      |                                   |                                                                                              |            | patients in control group not included in analyses (Patients who were discharged when symptom-free, withdrawn from treatment, for had treatment stopped due to elevated ALT or AST levels were excluded). 16% were excluded from analyses |                                               | attrition, and absence of information on allocation concealment |
| Abd-Elsalam 2021 (9) | Low, adequate, computer generated | Low, adequate, sequentially numbered opaque sealed envelopes kept by the hospital pharmacist | Open-label | Low, 5 patients in remdesivir and 4 patients in control group not included in analyses (transferred to another hospital)                                                                                                                  | Yes, did not report viral load data (noted as | Low                                                             |

ALT = alanine aminotransferase; AST = aspartate aminotransferase; ITT = intent-to-treat

\* For the open-label trial, blinding of study participants and study personnel was not feasible. This element was not considered in rating overall risk of bias.

† Incomplete outcome data was rated high if more than 10% of participants randomized were not included in the analyses.

‡ Selective reporting was determined by comparing reported outcomes with outcomes specified in the Methods section. If a protocol paper was available, reported outcomes were compared with outcomes specified in the protocol.

§ Studies were rated low risk of bias if at least 3 elements were rated low and no additional elements were rated high. Studies were rated High risk of bias if at least 2 elements were rated high risk of bias. All other studies were rated Moderate risk of bias.

|| Sub-study of WHO Solidarity with additional newer recruited patients not included in WHO Solidarity study results

**Supplement Table 10. COVID-19 disease severity**

| <b>COVID-19 Disease Severity</b> | <b>NIH COVID-19 Treatment Guidelines (11)</b>                                                                                                                                                           | <b>WHO Clinical Management of COVID-19 (12)</b>                                                                                                                                                                                                                                                                                            | <b>Food and Drug Administration (FDA) (13)</b>                                                                                                                                                                                                                                                                                                                                                                                                                                       | <b>Included Studies in Evidence Report</b>                                                                                                                                                                                                                                                                                                                                                  |
|----------------------------------|---------------------------------------------------------------------------------------------------------------------------------------------------------------------------------------------------------|--------------------------------------------------------------------------------------------------------------------------------------------------------------------------------------------------------------------------------------------------------------------------------------------------------------------------------------------|--------------------------------------------------------------------------------------------------------------------------------------------------------------------------------------------------------------------------------------------------------------------------------------------------------------------------------------------------------------------------------------------------------------------------------------------------------------------------------------|---------------------------------------------------------------------------------------------------------------------------------------------------------------------------------------------------------------------------------------------------------------------------------------------------------------------------------------------------------------------------------------------|
| Asymptomatic or Pre-symptomatic  | Individuals who test positive for SARS-CoV-2 by virologic testing using a molecular diagnostic (eg, polymerase chain reaction) or antigen test, but have no symptoms.                                   | <b>NA</b>                                                                                                                                                                                                                                                                                                                                  | Positive testing by standard reverse transcription polymerase chain reaction (RT-PCR) assay or equivalent test; no symptoms.                                                                                                                                                                                                                                                                                                                                                         | <b>NA</b>                                                                                                                                                                                                                                                                                                                                                                                   |
| Mild                             | Individuals who have any of the various signs and symptoms of COVID 19 (eg, fever, cough, sore throat, malaise, headache, muscle pain) without shortness of breath, dyspnea, or abnormal chest imaging. | Symptomatic patients meeting the case definition for COVID-19 without evidence of viral pneumonia or hypoxia.                                                                                                                                                                                                                              | Positive testing by standard RT-PCR assay or equivalent test; symptoms of mild illness with COVID-19 that could include fever, cough, sore throat, malaise, headache, muscle pain, gastrointestinal symptoms, without shortness of breath or dyspnea; no clinical signs indicative of Moderate, Severe, or Critical Severity                                                                                                                                                         | <b>ACTT-1 (1):</b> Mild/Moderate disease: confirmed COVID-19 positive and hospitalized with radiographic infiltrates by imaging, SpO <sub>2</sub> >94% and respiratory rate <24 breaths per minute without supplemental oxygen. Mild not defined. Results for Mild not provided.                                                                                                            |
| Moderate                         | Individuals who have evidence of lower respiratory disease by clinical assessment or imaging and a saturation of oxygen (SpO <sub>2</sub> ) ≥94% on room air at sea level.                              | Adolescent or adult with clinical signs of pneumonia (fever, cough, dyspnoea, fast breathing) but no signs of severe pneumonia, including SpO <sub>2</sub> ≥90% on room air OR Child with clinical signs of non-severe pneumonia (cough or difficulty breathing + fast breathing and/or chest indrawing) and no signs of severe pneumonia. | Positive testing by standard RT-PCR assay or equivalent testing; symptoms of moderate illness with COVID-19, which could include any symptom of mild illness or shortness of breath with exertion; clinical signs suggestive of moderate illness with COVID-19, such as respiratory rate ≥20 breaths per minute, saturation of oxygen (SpO <sub>2</sub> ) >93% on room air at sea level, heart rate ≥90 beats per minute; no clinical signs indicative of Severe or Critical Illness | <b>ACTT-1 (1):</b> Mild/Moderate disease: confirmed COVID-19 positive and hospitalized with radiographic infiltrates by imaging, SpO <sub>2</sub> >94% and respiratory rate <24 breaths per minute without supplemental oxygen. Moderate not further defined. Results for Moderate not provided.<br><br><b>SIMPLE 2 (4):</b> Moderate disease: confirmed COVID-19 positive and hospitalized |

| COVID-19 Disease Severity | NIH COVID-19 Treatment Guidelines (11)                                                                                                                                                                                                                                                  | WHO Clinical Management of COVID-19 (12)                                                                                                                                                                                                                                                                                                                                                                                                                                                                                                                                                                                                                               | Food and Drug Administration (FDA) (13)                                                                                                                                                                                                                                                                                                                                                                                                                                                                                                                                                                                                                                                                                                                                                               | Included Studies in Evidence Report                                                                                                                                                                                                                                                                                                                                                                                                                                                                                                                      |
|---------------------------|-----------------------------------------------------------------------------------------------------------------------------------------------------------------------------------------------------------------------------------------------------------------------------------------|------------------------------------------------------------------------------------------------------------------------------------------------------------------------------------------------------------------------------------------------------------------------------------------------------------------------------------------------------------------------------------------------------------------------------------------------------------------------------------------------------------------------------------------------------------------------------------------------------------------------------------------------------------------------|-------------------------------------------------------------------------------------------------------------------------------------------------------------------------------------------------------------------------------------------------------------------------------------------------------------------------------------------------------------------------------------------------------------------------------------------------------------------------------------------------------------------------------------------------------------------------------------------------------------------------------------------------------------------------------------------------------------------------------------------------------------------------------------------------------|----------------------------------------------------------------------------------------------------------------------------------------------------------------------------------------------------------------------------------------------------------------------------------------------------------------------------------------------------------------------------------------------------------------------------------------------------------------------------------------------------------------------------------------------------------|
|                           |                                                                                                                                                                                                                                                                                         |                                                                                                                                                                                                                                                                                                                                                                                                                                                                                                                                                                                                                                                                        |                                                                                                                                                                                                                                                                                                                                                                                                                                                                                                                                                                                                                                                                                                                                                                                                       | <p>with radiographic evidence of pulmonary infiltrates and oxygen saturation &gt;94% on room air.</p> <p><b>WHO (5):</b> Not defined as “moderate” but SOLIDARITY included and provided mortality data for hospitalized patients without supplemental oxygen on study entry.</p>                                                                                                                                                                                                                                                                         |
| Severe                    | <p>Individuals who have respiratory frequency &gt;30 breaths per minute, SpO<sub>2</sub> &lt;94% on room air at sea level, ratio of arterial partial pressure of oxygen to fraction of inspired oxygen (PaO<sub>2</sub>/FiO<sub>2</sub>) &lt;300 mmHg, or lung infiltrates &gt;50%.</p> | <p>Adolescent or adult with clinical signs of pneumonia (fever, cough, dyspnoea, fast breathing) plus one of the following: respiratory rate &gt;30 breaths/min; severe respiratory distress; or SpO<sub>2</sub> &lt;90% on room air OR Child with clinical signs of pneumonia (cough or difficulty in breathing) + at least one of the following:</p> <p>1) Central cyanosis or SpO<sub>2</sub> &lt;90%; severe respiratory distress (eg, fast breathing, grunting, very severe chest indrawing); general danger sign: inability to breastfeed or drink, lethargy or unconsciousness, or convulsions. 2) Fast breathing (in breaths/min): &lt;2 months: ≥60; 2–11</p> | <p>Positive testing by standard RT-PCR assay or an equivalent test; symptoms suggestive of severe systemic illness with COVID-19, which could include: any symptom of moderate illness or shortness of breath at rest, or respiratory distress; clinical signs indicative of severe systemic illness with COVID-19, such as respiratory rate ≥30 per minute, heart rate ≥125 per minute, SpO<sub>2</sub> ≤93% on room air at sea level or PaO<sub>2</sub>/FiO<sub>2</sub> &lt;300; no criteria for Critical Severity.</p> <p>Remdesivir Emergency Use Authorization Criteria: Hospitalized with severe disease defined as patients with an oxygen saturation ≤94% on room air or requiring supplemental oxygen or mechanical ventilation or requiring extracorporeal membrane oxygenation (ECMO).</p> | <p><b>Wang (2), ACTT-1 (1), SIMPLE-1 (3):</b> Hospitalized patients meeting one of more of the following criteria: radiographic infiltrates by imaging or clinical assessment and an oxygen saturation ≤94% on room air or tachypnea (respiratory rate &gt;24 breaths per minute without supplemental oxygen) or requiring supplemental oxygen or mechanical ventilation</p> <p><b>WHO (5, 7, 8):</b> Not defined as “severe” but SOLIDARITY included and provided mortality data for hospitalized patients with supplemental oxygen on study entry.</p> |

| COVID-19 Disease Severity | NIH COVID-19 Treatment Guidelines (11)                                                     | WHO Clinical Management of COVID-19 (12)                                                  | Food and Drug Administration (FDA) (13)                                                                                                                                                                                                                                                                                                                                                                                                                                                                                                                                                                                                                                                                                                                                                                                                                                                    | Included Studies in Evidence Report                                                                                                                                                                                                                                                                                                                                         |
|---------------------------|--------------------------------------------------------------------------------------------|-------------------------------------------------------------------------------------------|--------------------------------------------------------------------------------------------------------------------------------------------------------------------------------------------------------------------------------------------------------------------------------------------------------------------------------------------------------------------------------------------------------------------------------------------------------------------------------------------------------------------------------------------------------------------------------------------------------------------------------------------------------------------------------------------------------------------------------------------------------------------------------------------------------------------------------------------------------------------------------------------|-----------------------------------------------------------------------------------------------------------------------------------------------------------------------------------------------------------------------------------------------------------------------------------------------------------------------------------------------------------------------------|
|                           |                                                                                            | months: ≥50; 1–5 years: ≥40.                                                              |                                                                                                                                                                                                                                                                                                                                                                                                                                                                                                                                                                                                                                                                                                                                                                                                                                                                                            |                                                                                                                                                                                                                                                                                                                                                                             |
| Critical                  | Individuals who have respiratory failure, septic shock, and/or multiple organ dysfunction. | Individuals who have respiratory failure, septic shock, and/or multiple organ dysfunction | Positive testing by standard RT-PCR assay or equivalent test; evidence of critical illness, defined by at least one of the following: respiratory failure defined based on resource utilization requiring at least one of the following: endotracheal intubation and mechanical ventilation, oxygen delivered by high flow nasal cannula (heated, humidified, oxygen delivered via reinforced nasal cannula at flow rates >20 L/min with fraction of delivered oxygen ≥0.5), noninvasive positive pressure ventilation, ECMO, or clinical diagnosis of respiratory failure ( <i>ie</i> , clinical need for one of the preceding therapies, but preceding therapies not able to be administered in setting of resource limitation); shock (defined by systolic blood pressure <90 mm Hg, or diastolic blood pressure <60 mm Hg or requiring vasopressors); multi-organ dysfunction/failure. | <p><b>ACTT-1(1):</b> Not defined as “critical” but ACTT-1 included and provided recovery outcomes for patients requiring invasive mechanical ventilation or ECMO.</p> <p><b>WHO(5, 7, 8):</b> Not defined as “critical” but SOLIDARITY included and provided mortality data for hospitalized patients requiring invasive mechanical ventilation or ECMO on study entry.</p> |

## References

1. Beigel JH, Tomashek KM, Dodd LE, et al. Remdesivir for the treatment of Covid-19 - final report. *N Engl J Med.* 2020;383(19):1813-26.
2. Wang Y, Zhang D, Du G, et al. Remdesivir in adults with severe COVID-19: a randomised, double-blind, placebo-controlled, multicentre trial. *Lancet.* 2020;395(10236):1569-78.
3. Goldman JD, Lye DCB, Hui DS, et al. Remdesivir for 5 or 10 days in patients with severe Covid-19. *N Engl J Med.* 2020;383(19):1827-37.
4. Spinner CD, Gottlieb RL, Criner GJ, et al. Effect of remdesivir vs standard care on clinical status at 11 days in patients with moderate COVID-19. A randomized clinical trial. *JAMA.* 2020;324(11):1048-57.
5. WHO Solidarity Trial Consortium. Repurposed antiviral drugs for Covid-19 - interim WHO Solidarity Trial Results. *N Engl J Med.* 2020.
6. Mahajan L, AP Singh G. Clinical outcomes of using remdesivir in patients with moderate to severe COVID-19: A prospective randomised study. *Indian Journal of Anaesthesia.* 2021;65(Suppl 1):S41.
7. Barratt-Due A, Olsen IC, Nezvalova-Henriksen K, et al. Evaluation of the effects of remdesivir and hydroxychloroquine on viral clearance in COVID-19: A randomized trial. *Annals of internal medicine.* 2021.
8. Ader F, Bouscambert-Duchamp M, Hites M, et al. Remdesivir plus standard of care versus standard of care alone for the treatment of patients admitted to hospital with COVID-19 (DisCoVeRy): a phase 3, randomised, controlled, open-label trial. *Lancet Infect Dis.* 2021.
9. Abd-Elsalam S, Ahmed OA, Mansour NO, et al. Remdesivir efficacy in COVID-19 treatment: A randomized controlled trial. *Am J Trop Med Hyg.* 2021.
10. Schunemann H, Brozek J, Guyatt G, al. eds; Accessed at <https://gdt.gradepro.org/app/handbook/handbook.html> on October 29, 2021.
11. NIH COVID-19 treatment guidelines; accessed at <https://www.covid19treatmentguidelines.nih.gov/overview/clinical-spectrum/> on July 24, 2020
12. WHO COVID-19 guidelines; accessed at <https://www.who.int/publications/i/item/clinical-management-of-covid-19> on 24 July 2020.
13. US FDA; accessed at <https://www.fda.gov/media/137926/download>. on July 24, 2020.
